# Supplementary material
Source: publisher site journal article supplement (https://www.spandidos-publications.com/2760/downloadSupplementary)
Supplement: Supplementary file 1 [file downloadSupplementary]

## Sheet: Sheet2
Table SI. Blood biochemical indices and treatment protocol
Day	0	1	2	3	4	5	6	7	8	9	10	11	12	13	14	15	16	17	18	19	20	21	22	23	24	25	26	27	28	29	30
Parameter measured
T ℃	41	40.6	36.9	38.8	38.8	38.5	40.6	38.5	39.5	38	38.2	37.8	37.8	36.3	36.5	37.3	36.8	36.8	36.5	36.5	36	36.4	36.5	36.4	36.7	36.1	36.1	36.5	36.5	36.7	36.8
Whole blood cell values
WBC 10^9/l	6.2	5.24	4.88	2.33	2.94	5.84	6.62	6.57	6.48	7.36	7.47	5.93	6.97	NA	4.93	NA	4.73	NA	4.48	1.83	3.21	NA	5.59	NA	NA	7.39	NA	NA	NA	NA	12.68
NEUT %	45.8	44.74	65.04	48.1	39.1	16.44	15.84	27.34	16.64	32.14	28.34	22.94	37.2	NA	31.74	NA	22.02	NA	20.54	66.64	19.32	NA	27.74	NA	NA	21.14	NA	NA	NA	NA	15.54
LYMPH %	47.9	54.24	30.94	45.9	49.7	71.94	74.84	62.64	72.14	58.74	62.94	69.54	54.91	NA	58.84	NA	70.81	NA	73.74	29	77.91	NA	71.04	NA	NA	75.54	NA	NA	NA	NA	80.04
Hb g/l	93	90	85	75	91	92	86	74	95	97	91	66	67	NA	99	NA	98	NA	100	120	102	NA	108	NA	NA	105	NA	NA	NA	NA	110
PLT 10^9/l	79	97	94	86	26	70	89	83	83	99	91	104	109	NA	88	NA	72	NA	100	99	104	NA	176	NA	NA	230	NA	NA	NA	NA	311
RET %	NA	0.42	0.5	0.39	0.41	0.7	1.84	NA	2.95	2.76	3.16	5.41	6.7	NA	4.94	NA	4.25	NA	2.43	2.6	1.74	NA	1.23	NA	NA	1.06	NA	NA	NA	NA	1.31
Blood biochemical indicies
ALB g/l	NA	32.8	28.5	NA	35.3	33.1	NA	NA	NA	NA	39.7	NA	40.8	NA	NA	NA	51.6	50.8	NA	53.5	NA	NA	NA	NA	NA	NA	NA	NA	NA	NA	53.8
ALT u/l	NA	27	27	NA	22	33	NA	NA	NA	NA	29	NA	13	NA	NA	NA	17	18	NA	29	NA	NA	NA	NA	NA	NA	NA	NA	NA	NA	16
AST u/L	NA	78	63	NA	57	55	71	NA	NA	NA	61	NA	46	NA	NA	NA	46	48	NA	66	NA	NA	NA	NA	NA	NA	NA	NA	NA	NA	29
LDH u/l	NA	2415	4149	NA	1460	NA	3741	NA	NA	NA	NA	NA	966	NA	NA	NA	752	770	NA	NA	NA	NA	NA	NA	NA	NA	NA	NA	NA	NA	370
Urea mmol/l	NA	13	19.9	9.65	10.38	24.48	12.7	16.4	8.2	14.7	11.8	NA	14.45	NA	16.1	NA	14.22	15.11	19.39	13.3	16.5	NA	13.96	NA	NA	11.75	NA	NA	NA	NA	16.88
CRE µmol/l	NA	188.6	243.3	151.1	169	233.6	176.6	232.9	150.9	198.8	143.7	NA	147	NA	230	NA	176	159	146	123.9	134.1	NA	94.3	NA	NA	75	NA	NA	NA	NA	71
eGFR ml/min.1.73m^2	NA	52	39	69	60	40	57	41	69	49	73	NA	71	NA	41	NA	57	64	71	87	79	NA	121	NA	NA	152	NA	NA	NA	NA	155
CRP mg/l	NA	104.14	78.01	NA	63.03	NA	NA	45.9	NA	NA	NA	NA	NA	NA	10.44	NA	19.47	NA	NA	NA	NA	NA	NA	NA	NA	NA	NA	NA	NA	NA	0.33
PCT µg/ml	NA	12.16	21.81	NA	9.49	NA	NA	5.9	4.17	NA	1.13	NA	NA	NA	NA	NA	0.133	NA	NA	1.36	NA	NA	NA	NA	NA	NA	NA	NA	NA	NA	0.025
SF µg/l	NA	NA	950	NA	NA	NA	NA	NA	NA	2237	NA	NA	1662	NA	NA	NA	971	NA	NA	NA	NA	NA	NA	NA	NA	NA	NA	NA	NA	NA	922
ESR Mm/h	NA	NA	43	NA	NA	NA	NA	NA	NA	NA	NA	NA	NA	NA	NA	NA	NA	NA	NA	NA	NA	NA	NA	NA	NA	NA	NA	NA	NA	NA	NA
TC mmol/l	NA	<1.29	NA	NA	2.1	NA	NA	NA	NA	4.3	NA	NA	4.73	NA	NA	NA	NA	NA	NA	NA	NA	NA	NA	NA	NA	NA	NA	NA	NA	NA	NA
TG mmol/l	NA	1.75	NA	NA	3.17	NA	NA	NA	NA	5.07	NA	NA	4.65	NA	NA	NA	NA	NA	NA	NA	NA	NA	NA	NA	NA	NA	NA	NA	NA	NA	NA
Fib g/l	NA	4.27	NA	NA	3.02	NA	NA	3.18	NA	NA	2.95	NA	2.06	NA	NA	NA	NA	NA	1.95	2.17	NA	NA	NA	NA	NA	1.66	NA	NA	NA	NA	1.71
PT s	NA	13.5	NA	NA	112.7	NA	NA	13.1	NA	NA	10.6	NA	11.2	NA	NA	NA	NA	NA	12.4	15.8	NA	NA	NA	NA	NA	10.6	NA	NA	NA	NA	9.7
APTT s	NA	41.9	NA	NA	40.1	NA	NA	45.1	NA	NA	24	NA	30	NA	NA	NA	NA	NA	38.1	51	NA	NA	NA	NA	NA	31	NA	NA	NA	NA	26
CD19	NA	NA	NA	NA	29.8	NA	NA	NA	NA	NA	NA	NA	NA	NA	NA	NA	NA	NA	NA	NA	NA	NA	NA	NA	NA	NA	NA	NA	NA	NA	31
CD16 CD56	NA	NA	NA	NA	0.127	NA	NA	NA	NA	NA	NA	NA	NA	NA	NA	NA	NA	NA	NA	NA	NA	NA	NA	NA	NA	NA	NA	NA	NA	NA	5.8↓
CD3	NA	NA	NA	NA	0.512	NA	NA	NA	NA	NA	NA	NA	NA	NA	NA	NA	NA	NA	NA	NA	NA	NA	NA	NA	NA	NA	NA	NA	NA	NA	61.5
CD4	NA	NA	NA	NA	0.223	NA	NA	NA	NA	NA	NA	NA	NA	NA	NA	NA	NA	NA	NA	NA	NA	NA	NA	NA	NA	NA	NA	NA	NA	NA	40.9
CD8	NA	NA	NA	NA	0.264	NA	NA	NA	NA	NA	NA	NA	NA	NA	NA	NA	NA	NA	NA	NA	NA	NA	NA	NA	NA	NA	NA	NA	NA	NA	18.2
CD4/CD8	NA	NA	NA	NA	0.84	NA	NA	NA	NA	NA	NA	NA	NA	NA	NA	NA	NA	NA	NA	NA	NA	NA	NA	NA	NA	NA	NA	NA	NA	NA	2.25
Cytokines	NA	NA	NA	NA	NA	NA	NA	NA	NA	NA	NA	NA	<5	NA	NA	NA	NA	NA	NA	NA	NA	NA	NA	NA	NA	NA	NA	NA	NA	NA	<5
IL-1β pg/ml	NA	NA	NA	NA	NA	NA	NA	NA	NA	NA	NA	NA	18.5↑	NA	NA	NA	NA	NA	NA	NA	NA	NA	NA	NA	NA	NA	NA	NA	NA	NA	7.63
IL-6 pg/ml	NA	NA	NA	NA	NA	NA	NA	NA	NA	NA	NA	NA	55.4	NA	NA	NA	NA	NA	NA	NA	NA	NA	NA	NA	NA	NA	NA	NA	NA	NA	12.4
IL-8 pg/ml	NA	NA	NA	NA	NA	NA	NA	NA	NA	NA	NA	NA	307	NA	NA	NA	NA	NA	NA	NA	NA	NA	NA	NA	NA	NA	NA	NA	NA	NA	<5
IL-10 pg/ml	NA	NA	NA	NA	NA	NA	NA	NA	NA	NA	NA	NA	>7500	NA	NA	NA	NA	NA	NA	NA	NA	NA	NA	NA	NA	NA	NA	NA	NA	NA	1120
IL-2R U/ml	NA	NA	NA	NA	NA	NA	NA	NA	NA	NA	NA	NA	NA	NA	NA	NA	NA	NA	NA	NA	NA	NA	NA	NA	NA	NA	NA	NA	NA	NA	NA
Treatment	NA	NA	NA	NA	NA	NA	NA	NA	NA	NA	NA	NA	NA	NA	NA	NA	NA	NA	NA	NA	NA	NA	NA	NA	NA	NA	NA	NA	NA	NA	NA
DEX mg	NA	2.5	5	5	3	1	1	1	1.5	1.5	NA	NA	2	3	3	3	3	3	3	3	3	3	3	3	3	3	3	NA	NA	NA	NA
IVIG g	NA	NA	5		5	5	NA	NA	NA	NA	NA	NA	NA	NA	NA	NA	NA	NA	NA	NA	NA	NA	NA	NA	NA	NA	NA	NA	NA	NA	NA
Hemodialysis	NA	NA	1	1	NA	1	NA	1	NA	1	NA	NA	NA	NA	1	NA	NA	NA	NA	NA	NA	NA	NA	NA	NA	NA	NA	NA	NA	NA	NA
Transfusion ml	NA	NA	NA	150	NA	NA	NA	200	NA	NA	NA	NA	200	NA	NA	NA	NA	NA	NA	NA	NA	NA	NA	NA	NA	NA	NA	NA	NA	NA	NA
Plasma ml	NA	NA	NA	NA	150	NA	150	NA	200	NA	NA	NA	NA	NA	NA	NA	NA	NA	NA	NA	NA	NA	NA	NA	NA	NA	NA	NA	NA	NA	NA
NA, not available
